# Supplementary material for: Complete genome sequence of the newly discovered temperate Clostridioides difficile bacteriophage phiCDKH01 of the family Siphoviridae
Source: PubMed Central journal article supplement (PMC8270841; doi:10.1007/s00705-021-05092-0), 2021-05-20
Supplement: 705_2021_5092_MOESM1_ESM.pdf [file 705_2021_5092_MOESM1_ESM.pdf]

**Complete genome sequence of the newly discovered temperate *Clostridioides difficile* bacteriophage phiCDKH01 of the family *Siphoviridae***

Archives of Virology

Krzysztof Hinc<sup>1\*</sup>, Monika Kabała<sup>2</sup>, Adam Iwanicki<sup>1</sup>, Gajane Martirosian<sup>2</sup>, Alessandro Negri<sup>1</sup> Michał Obuchowski<sup>1</sup>

<sup>1</sup>Department of Molecular Bacteriology, Intercollegiate Faculty of Biotechnology of University of Gdańsk and Medical University of Gdańsk, Dębinki 1, Gdańsk 80-211, Poland

<sup>2</sup>Department of Medical Microbiology, Medical University of Silesia, Faculty of Medical Sciences in Katowice, Medyków 18, Katowice 40-752, Poland

\* corresponding author: krzysztof.hinc@biotech.ug.edu.pl

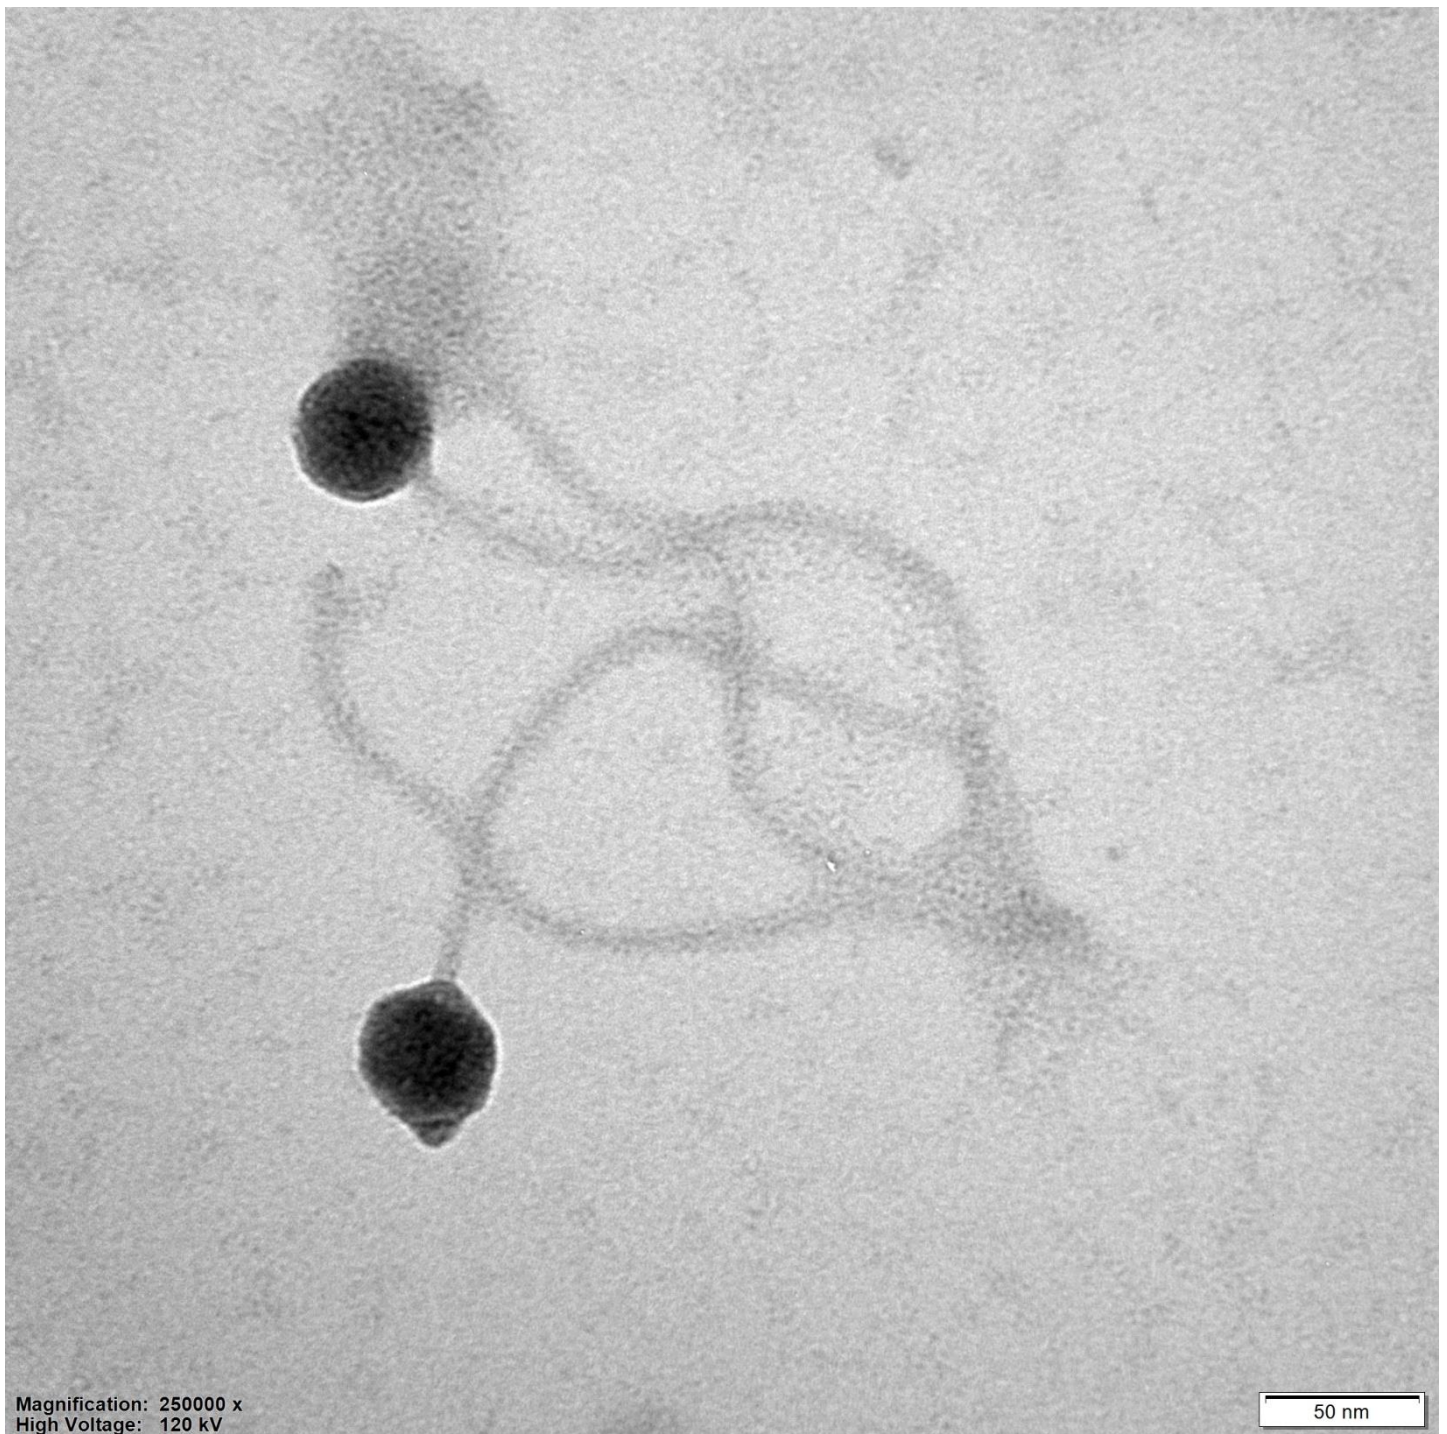

Fig. S1 phiCDKH01 morphology observed using a transmission electron microscope Tecnai Spirit BioTWIN microscope (FEI) at an acceleration voltage of 120 kV. Phage particles were stained with 2% uranyl acetate.

Table S1. ORFs locations, transcriptional orientations, sizes of encoded proteins, possible function, BLAST hit, alignment and E value

| Locus tag    | Coding region (bp) | Strand | Protein size (aa) | Predicted functional                              | BLAST hit [source organism] <sup>a</sup>                                                         | Accession number | Alignment (%ID)   | E value |
|--------------|--------------------|--------|-------------------|---------------------------------------------------|--------------------------------------------------------------------------------------------------|------------------|-------------------|---------|
| phiCDKH01_01 | 4-576              | +      | 190               | tail protein - partial                            | phage tail protein [ <i>Clostridioides difficile</i> ]                                           | MBH6979172.1     | 190/636<br>(100%) | 3e-125  |
| phiCDKH01_02 | 611-2944           | +      | 777               | hypothetical protein                              | hypothetical protein [ <i>Clostridioides difficile</i> ]                                         | WP_021411116.1   | 777/777<br>(100%) | 0.0     |
| phiCDKH01_03 | 2959-3285          | +      | 108               | hypothetical protein                              | hypothetical protein [ <i>Clostridioides difficile</i> ]                                         | WP_021411117.1   | 108/108<br>(100%) | 2e-69   |
| phiCDKH01_04 | 3311-3463          | +      | 50                | hypothetical protein                              | hypothetical protein [ <i>Clostridioides difficile</i> ]                                         | WP_021372475.1   | 50/50<br>(100%)   | 3e-25   |
| phiCDKH01_05 | 3527-3793          | +      | 88                | holin                                             | putative holin [ <i>Clostridium phage phiCD24-1</i> ]                                            | CEK40241.1       | 88/88<br>(100%)   | 2e-63   |
| phiCDKH01_06 | 3728-3504          | +      | 268               | N-acetylmuramoyl-L-alanine amidase                | N-acetylmuramoyl-L-alanine amidase [ <i>Clostridioides difficile</i> ]                           | WP_021411118.1   | 268/268<br>(100%) | 0.0     |
| phiCDKH01_07 | 4644-4820          | -      | 58                | AbrB/MazE/SpoVT family DNA-binding domain protein | AbrB/MazE/SpoVT family DNA-binding domain-containing protein [ <i>Clostridioides difficile</i> ] | WP_021411119.1   | 58/58<br>(100%)   | 2e-33   |
| phiCDKH01_08 | 4821-4988          | -      | 55                | hypothetical protein                              | hypothetical protein [ <i>Clostridioides difficile</i> ]                                         | WP_021411120.1   | 55/55<br>(100%)   | 2e-28   |
| phiCDKH01_09 | 5065-5193          | -      | 42                | membrane protein                                  | putative membrane protein [ <i>Clostridioides difficile</i> P24]                                 | EQJ50015.1       | 42/42<br>(69.05%) | 1e-09   |
| phiCDKH01_10 | 5517-5702          | -      | 61                | PemI protein                                      | PemI [ <i>Clostridioides difficile</i> ]                                                         | WP_077725908     | 61/61             | 1e-34   |

|              |             |   |     |                                   |                                                                               |                |                                    |        |
|--------------|-------------|---|-----|-----------------------------------|-------------------------------------------------------------------------------|----------------|------------------------------------|--------|
| phiCDKH01_11 | 5931-6059   | - | 42  | hypothetical protein              | hypothetical protein QUA_1656 [ <i>Clostridioides difficile</i> P49]          | EQJ91741.1     | <b>(96.72%)</b><br>42/42<br>(100%) | 3e-18  |
| phiCDKH01_12 | 6577-7707   | - | 376 | integrase                         | site-specific integrase [ <i>Clostridioides difficile</i> ]                   | WP_021411091.1 | <b>376/376</b><br>(100%)           | 0.0    |
| phiCDKH01_13 | 7948-8454   | - | 168 | metallo-endopeptidase             | MULTISPECIES: ImmA/IrrE family metallo-endopeptidase [ <i>Clostridiales</i> ] | WP_003429804.1 | <b>168/168</b><br>(100%)           | 1e-114 |
| phiCDKH01_14 | 8558-8980   | - | 140 | TIR domain-containing protein     | TIR domain-containing protein [ <i>Clostridioides difficile</i> ]             | WP_021365371.1 | <b>140/140</b><br>(100%)           | 2e-95  |
| phiCDKH01_15 | 9044-9265   | + | 73  | hypothetical protein              | hypothetical protein [ <i>Clostridioides difficile</i> ]                      | WP_021365372.1 | 73/73<br>(100%)                    | 5e-45  |
| phiCDKH01_16 | 9279-9695   | - | 138 | DUF4231 domain-containing protein | DUF4231 domain-containing protein [ <i>Clostridioides difficile</i> ]         | WP_021365373.1 | <b>138/138</b><br>(100%)           | 9e-90  |
| phiCDKH01_17 | 9704-10249  | - | 181 | transcriptional regulator         | MULTISPECIES: XRE family transcriptional regulator [ <i>Clostridiales</i> ]   | WP_003433494.1 | <b>181/181</b><br>(100%)           | 6e-128 |
| phiCDKH01_18 | 10294-10410 | - | 38  | membrane protein                  | putative membrane protein [ <i>Clostridioides difficile</i> CD22]             | EQE30741.1     | <b>38/38</b><br>(100%)             | 3e-14  |

|                     |                    |          |            |                                                           |                                                                                                  |                       |                           |              |
|---------------------|--------------------|----------|------------|-----------------------------------------------------------|--------------------------------------------------------------------------------------------------|-----------------------|---------------------------|--------------|
| <b>phiCDKH01_19</b> | <b>10430-10645</b> | <b>+</b> | <b>71</b>  | <b>transcriptional regulator</b>                          | <b>helix-turn-helix transcriptional regulator<br/>[<i>Clostridioides difficile</i>]</b>          | <b>WP_021424794.1</b> | <b>71/71<br/>(100%)</b>   | <b>9e-43</b> |
| <b>phiCDKH01_20</b> | <b>10676-11494</b> | <b>+</b> | <b>272</b> | <b>antirepressor protein</b>                              | <b>phage antirepressor KilAC domain-containing protein<br/>[<i>Clostridioides difficile</i>]</b> | <b>WP_022583452.1</b> | <b>272/272<br/>(100%)</b> | <b>0.0</b>   |
| phiCDKH01_21        | 11543-11680        | +        | 45         | hypothetical protein                                      | hypothetical protein [ <i>Clostridioides difficile</i> ]                                         | WP_165479131.1        | 45/45<br>(100%)           | 1e-22        |
| <b>phiCDKH01_22</b> | <b>11692-11859</b> | <b>-</b> | <b>55</b>  | <b>DNA-binding protein</b>                                | <b>MULTISPECIES: Arc family DNA-binding protein<br/>[<i>Clostridiales</i>]</b>                   | <b>WP_021418310.1</b> | <b>55/55<br/>(100%)</b>   | <b>5e-30</b> |
| <b>phiCDKH01_23</b> | <b>11982-12158</b> | <b>+</b> | <b>58</b>  | <b>HicB antitoxin</b>                                     | <b>toxin-antitoxin system HicB family<br/>antitoxin [<i>Clostridioides difficile</i>]</b>        | <b>WP_021424796.1</b> | <b>58/58<br/>(100%)</b>   | <b>1e-33</b> |
| <b>phiCDKH01_24</b> | <b>12151-12954</b> | <b>+</b> | <b>267</b> | <b>antirepressor protein</b>                              | <b>phage antirepressor KilAC domain-containing<br/>protein [<i>Clostridioides difficile</i>]</b> | <b>WP_103899391.1</b> | <b>267/267<br/>(100%)</b> | <b>0.0</b>   |
| phiCDK01_25         | 13002-13184        | +        | 60         | hypothetical protein                                      | hypothetical protein [ <i>Clostridioides difficile</i> ]                                         | WP_021365376.1        | 60/60<br>(100%)           | 5e-32        |
| phiCDKH01_26        | 13142-13378        | -        | 78         | hypothetical protein                                      | hypothetical protein [ <i>Clostridioides difficile</i> ]                                         | WP_021424801.1        | 78/78<br>(100%)           | 6e-46        |
| <b>phiCDKH01_27</b> | <b>13548-13940</b> | <b>+</b> | <b>130</b> | <b>helix-turn-helix<br/>domain-containing<br/>protein</b> | <b>helix-turn-helix domain-containing protein<br/>[<i>Clostridioides difficile</i>]</b>          | <b>WP_021424802.1</b> | <b>130/130<br/>(100%)</b> | <b>8e-86</b> |

|                     |                    |          |            |                                        |                                                                             |                   |                           |               |
|---------------------|--------------------|----------|------------|----------------------------------------|-----------------------------------------------------------------------------|-------------------|---------------------------|---------------|
| phiCDKH01_28        | 13927-14070        | +        | 47         | hypothetical protein                   | hypothetical protein [ <i>Clostridioides difficile</i> ]                    | WP_021390082.1    | 47/47<br>(100%)           | 1e-20         |
| phiCDKH01_29        | 14237-14479        | +        | 80         | hypothetical protein                   | hypothetical protein [ <i>Clostridioides difficile</i> ]                    | WP_021365380.1    | 80/80<br>(100%)           | 5e-50         |
| phiCDKH01_30        | 14558-14839        | +        | 93         | hypothetical protein                   | hypothetical protein [ <i>Clostridioides difficile</i> ]                    | WP_021365381.     | 93/93<br>(100%)           | 2e-60         |
| <b>phiCDKH01_31</b> | <b>14826-15464</b> | <b>+</b> | <b>212</b> | <b>recombinase</b>                     | <b>recombinase [<i>Clostridioides difficile</i>]</b>                        | <b>PCD11566.1</b> | <b>212/213<br/>(100%)</b> | <b>4e-151</b> |
| phiCDKH01_32        | 15474-16373        | +        | 299        | dnaD domain protein                    | dnaD domain protein [ <i>Clostridioides difficile</i> P49]                  | EQJ91696.1        | 299/299<br>(100%)         | 0.0           |
| phiCDKH01_33        | 16393-16812        | +        | 139        | single-stranded<br>DNA-binding protein | single-stranded DNA-binding protein<br>[ <i>Clostridioides difficile</i> ]  | WP_021411097.1    | 139/139<br>(100%)         | 3e-96         |
| phiCDKH01_34        | 16893-16812        | +        | 120        | hypothetical protein                   | hypothetical protein [ <i>Clostridioides difficile</i> ]                    | WP_021424804.1    | 120/120<br>(100%)         | 9e-82         |
| phiCDKH01_35        | 16842-17204        | +        | 44         | hypothetical protein                   | hypothetical protein CDIF29637_02647<br>[ <i>Clostridioides difficile</i> ] | AXU54373.1        | 44/44<br>(100%)           | 2e-21         |

|                     |                    |          |            |                                                  |                                                                                        |                       |                           |              |
|---------------------|--------------------|----------|------------|--------------------------------------------------|----------------------------------------------------------------------------------------|-----------------------|---------------------------|--------------|
| phiCDKH01_36        | 17322-17441        | +        | 39         | hypothetical protein                             | hypothetical protein [ <i>Clostridioides difficile</i> ]                               | WP_021362348.1        | 39/39<br>(100%)           | 6e-19        |
| phiCDKH01_37        | 17485-17598        | +        | 37         | hypothetical protein                             | hypothetical protein QU3_0844 [ <i>Clostridioides difficile</i> P42]                   | EQJ70600.1            | 37/37<br>(97.30%)         | 2e-15        |
| phiCDKH01_38        | 17617-17814        | +        | 65         | hypothetical protein                             | hypothetical protein [ <i>Clostridioides difficile</i> ]                               | WP_021408087          | 65/65<br>(100%)           | 4e-39        |
| <b>phiCDKH01_39</b> | <b>17841-18257</b> | <b>+</b> | <b>138</b> | <b>DUF1064<br/>domain-containing<br/>protein</b> | <b><i>DUF1064 domain-containing protein</i><br/>[<i>Clostridioides difficile</i>]</b>  | <b>WP_021362351.1</b> | <b>138/138<br/>(100%)</b> | <b>2e-89</b> |
| phiCDKH01_40        | 18276-18776        | +        | 166        | hypothetical protein                             | <i>hypothetical protein</i> [ <i>Clostridioides difficile</i> ]                        | WP_021362352.1        | 166/166<br>(100%)         | 1e-113       |
| <b>phiCDKH01_41</b> | <b>19040-19171</b> | <b>+</b> | <b>43</b>  | <b>membrane protein</b>                          | <b>putative membrane protein [<i>Clostridioides difficile</i><br/>CD22]</b>            | <b>EQE30759.1</b>     | <b>43/37<br/>(100%)</b>   | <b>6e-15</b> |
| <b>phiCDKH01_42</b> | <b>19186-19362</b> | <b>+</b> | <b>58</b>  | <b>PemI protein</b>                              | <b>putative PemI [<i>Clostridioides difficile</i>]</b>                                 | <b>VIB43238.1</b>     | <b>58/58<br/>(98.28%)</b> | <b>9e-32</b> |
| <b>phiCDKH01_43</b> | <b>19788-20228</b> | <b>+</b> | <b>146</b> | <b>terminase small subunit</b>                   | <b>terminase small subunit [<i>Clostridioides difficile</i>]</b>                       | <b>WP_021365389.1</b> | <b>146/146<br/>(100%)</b> | <b>1e-99</b> |
| <b>phiCDKH01_44</b> | <b>20221-21483</b> | <b>+</b> | <b>420</b> | <b>terminase large subunit</b>                   | <b>PBSX family phage terminase large subunit<br/>[<i>Clostridioides difficile</i>]</b> | <b>WP_021372000.1</b> | <b>420/420<br/>(100%)</b> | <b>0.0</b>   |

|              |             |   |     |                                                       |                                                                                           |                |                     |        |
|--------------|-------------|---|-----|-------------------------------------------------------|-------------------------------------------------------------------------------------------|----------------|---------------------|--------|
| phiCDKH01_45 | 21494-22978 | + | 494 | portal protein                                        | phage portal protein [ <i>Clostridioides difficile</i> ]                                  | WP_021411100.1 | 494/494<br>(100%)   | 0.0    |
| phiCDKH01_46 | 22978-24396 | + | 472 | ADP-ribosyltransferase<br>exoenzyme family<br>protein | ADP-ribosyltransferase exoenzyme family protein<br>[ <i>Clostridioides difficile</i> ]    | WP_021411101.1 | 472/472<br>(100%)   | 0.0    |
| phiCDKH01_47 | 24389-24565 | + | 58  | hypothetical protein                                  | hypothetical protein [ <i>Clostridioides difficile</i> ]                                  | WP_021365393.1 | 58/58<br>(100%)     | 2e-33  |
| phiCDKH01_48 | 24606-24836 | + | 76  | ADP-ribosyltransferase<br>exoenzyme family<br>protein | ADP-ribosyltransferase exoenzyme family protein<br>[ <i>Clostridioides difficile</i> P24] | EQJ49987.1     | 76/76<br>(100%)     | 1e-46  |
| phiCDKH01_49 | 24837-25052 | + | 71  | hypothetical protein                                  | hypothetical protein [ <i>Clostridioides difficile</i> ]                                  | WP_021365395.1 | 71/71<br>(100%)     | 3e-43  |
| phiCDKH01_50 | 25082-25258 | + | 58  | hypothetical protein                                  | hypothetical protein [ <i>Clostridioides difficile</i> ]                                  | WP_021365396.1 | 58/58<br>(100%)     | 6e-34  |
| phiCDKH01_51 | 25394-26029 | + | 211 | scaffolding protein                                   | phage scaffolding protein [ <i>Clostridioides difficile</i> ]                             | WP_021372476.1 | 211/211<br>(100%)   | 8e-149 |
| phiCDKH01_52 | 26047-27015 | + | 322 | capsid protein                                        | coat protein [ <i>Clostridioides difficile</i> ]                                          | WP_131043024.1 | 322/322<br>(99.69%) | 0.0    |
| phiCDKH01_53 | 27041-27295 | + | 84  | hypothetical protein                                  | hypothetical protein [ <i>Clostridioides difficile</i> ]                                  | WP_021365399.1 | 84/84<br>(100%)     | 2e-54  |
| phiCDKH01_54 | 27292-27654 | + | 120 | hypothetical protein                                  | hypothetical protein [ <i>Clostridioides difficile</i> ]                                  | WP_021411102.1 | 120/120<br>(100%)   | 1e-80  |

|                     |                    |          |             |                                      |                                                                                 |                       |                             |               |
|---------------------|--------------------|----------|-------------|--------------------------------------|---------------------------------------------------------------------------------|-----------------------|-----------------------------|---------------|
| phiCDKH01_55        | 27656-28090        | +        | 144         | hypothetical protein                 | hypothetical protein [ <i>Clostridioides difficile</i> ]                        | WP_021411103.1        | 144/144<br>(100%)           | 1e-102        |
| phiCDKH01_56        | 28098-28442        | +        | 114         | hypothetical protein                 | hypothetical protein [ <i>Clostridioides difficile</i> ]                        | WP_021365402.1        | 114/114<br>(100%)           | 2e-76         |
| phiCDKH01_57        | 28448-29254        | +        | 268         | hypothetical protein                 | hypothetical protein [ <i>Clostridioides difficile</i> ]                        | WP_021372459.1        | 268/268<br>(100%)           | 0.0           |
| phiCDKH01_58        | 29313-29789        | +        | 158         | hypothetical protein                 | hypothetical protein [ <i>Clostridioides difficile</i> ]                        | WP_021411104.1        | 158/158<br>(100%)           | 3e-108        |
| phiCDKH01_59        | 29782-29979        | +        | 65          | hypothetical protein                 | conserved protein of unknown function<br>[ <i>Clostridium phage phiCD24-1</i> ] | CEK40228.1            | 65/77<br>(100%)             | 1e-37         |
| <b>phiCDKH01_60</b> | <b>30718-31251</b> | <b>+</b> | <b>177</b>  | <b>lipoprotein</b>                   | <b>lipoprotein [<i>Clostridioides difficile</i>]</b>                            | <b>WP_021411109.1</b> | <b>177/177<br/>(100%)</b>   | <b>7e-127</b> |
| <b>phiCDKH01_61</b> | <b>31357-36885</b> | <b>+</b> | <b>1842</b> | <b>tail tape-measure<br/>protein</b> | <b>phage tail tape measure protein [<i>Clostridioides<br/>difficile</i>]</b>    | <b>WP_021411110.1</b> | <b>1842/1842<br/>(100%)</b> | <b>0.0</b>    |
| <b>phiCDKH01_62</b> | <b>37323-38078</b> | <b>+</b> | <b>251</b>  | <b>tail family protein</b>           | <b>phage tail family protein [<i>Clostridioides difficile</i>]</b>              | <b>WP_021411111.1</b> | <b>251/251<br/>(100%)</b>   | <b>0.0</b>    |



|                     |                    |          |            |                                            |                                                                             |                       |                                   |              |
|---------------------|--------------------|----------|------------|--------------------------------------------|-----------------------------------------------------------------------------|-----------------------|-----------------------------------|--------------|
| <b>phiCDKH01_63</b> | <b>38080-40839</b> | <b>+</b> | <b>919</b> | <b>tail protein</b>                        | <b>phage tail protein [Clostridioides difficile]</b>                        | <b>WP_021411112.1</b> | <b>919/919</b><br><b>(100%)</b>   | <b>0.0</b>   |
| phiCDKH01_64        | 40826-41131        | +        | 101        | hypothetical protein                       | hypothetical protein [Clostridioides difficile]                             | WP_021411113.1        | 101/101<br>(100%)                 | 7e-69        |
| <b>phiCDKH01_65</b> | <b>41149-43368</b> | <b>+</b> | <b>739</b> | <b>pre-neck<br/>appendage-like protein</b> | <b>phage pre-neck appendage-like protein<br/>[Clostridioides difficile]</b> | <b>VIF60740.1</b>     | <b>739/739</b><br><b>(96.48%)</b> | <b>0.0</b>   |
| <b>phiCDKH01_66</b> | <b>44414-45076</b> | <b>+</b> | <b>220</b> | <b>membrane protein</b>                    | <b>putative membrane protein [Clostridioides<br/>difficile P53]</b>         | <b>ERM48055.1</b>     | <b>220/169</b><br><b>(96.45%)</b> | <b>1e-92</b> |

<sup>a</sup>Only the most relevant hit is shown

Table S2. CRISPR spacer analysis

**A. phiCDKH01 CRISPR-spacer sequences**

spacer1: cattattaagtcaaagtgtgatgtaactgaacttaa  
spacer2: agtatatctaataataaatgagttcttagttaacc  
spacer3: tggacgagtatatctgaaggtgtagtagtgcttg  
spacer4: gaattgaatgataacaaaaaaaaagcatgtaatgaac  
spacer5: gctcataataaccataagcgcttttggttaaattaa

**B. Spacer match on published *C. difficile* phage genomes**

| <u>phiCDKH01</u>   | 5 Hits | Length | Start | End   | E value |
|--------------------|--------|--------|-------|-------|---------|
| <b>spacer1</b>     | 100%   | 36     | 30230 | 30265 | 1e-08   |
| <b>spacer2</b>     | 100%   | 35     | 30296 | 30330 | 3e-08   |
| <b>spacer3</b>     | 100%   | 35     | 30361 | 30395 | 3e-08   |
| <b>spacer4</b>     | 100%   | 37     | 30426 | 30462 | 3e-09   |
| <b>spacer5</b>     | 100%   | 37     | 30493 | 30529 | 3e-09   |
| <u>phi027</u>      | No Hit |        |       |       |         |
| <u>phiC2</u>       | No Hit |        |       |       |         |
| <u>phiCD111</u>    | No Hit |        |       |       |         |
| <u>phiCD119</u>    | No Hit |        |       |       |         |
| <u>phiCD146</u>    | No Hit |        |       |       |         |
| <u>phiCD24-1</u>   | No Hit |        |       |       |         |
| <u>phiCD27</u>     | No Hit |        |       |       |         |
| <u>phiCD38-2</u>   | No Hit |        |       |       |         |
| <u>phiCD481-1</u>  | No Hit |        |       |       |         |
| <u>phiCD505</u>    | No Hit |        |       |       |         |
| <u>phiCD506</u>    | No Hit |        |       |       |         |
| <u>phiCD52</u>     | No Hit |        |       |       |         |
| <u>phiCD6356</u>   | No Hit |        |       |       |         |
| <u>phiCDHM1</u>    | No Hit |        |       |       |         |
| <u>phiCDHM11</u>   | No Hit |        |       |       |         |
| <u>phiCDHM19</u>   | No Hit |        |       |       |         |
| <u>phiE16</u>      | No Hit |        |       |       |         |
| <u>phiMMP01</u>    | No Hit |        |       |       |         |
| <u>phiMMP02</u>    | No Hit |        |       |       |         |
| <u>phiMMP03</u>    | No Hit |        |       |       |         |
| <u>phiMMP04</u>    | No Hit |        |       |       |         |
| <u>phiSemix9P1</u> | No Hit |        |       |       |         |
| <u>phiCD630-01</u> | No Hit |        |       |       |         |
| <u>phiCD630-02</u> | No Hit |        |       |       |         |
| <u>phiLIBA2945</u> | No Hit |        |       |       |         |
| <u>phiLIBA6276</u> | No Hit |        |       |       |         |

**C. Spacer match on published *C. difficile* strain genomes\***

|                |       |
|----------------|-------|
| <b>spacer2</b> | 1 Hit |
| CP028529.1     | 100%  |
| CP019858.1     | 100%  |
| CP016104.1     | 100%  |
| CP019469.1     | 100%  |
| LK933005.1     | 100%  |
| LK932396.1     | 100%  |
| LK932486.1     | 100%  |
| CP028361.1     | 100%  |
| FN665652.1     | 100%  |

|                |        |
|----------------|--------|
| CP029154.1     | 100%   |
| CP020424.2     | 100%   |
| <b>spacer5</b> | 1 Hit  |
| CP028529.1     | 97.14% |
| CP019858.1     | 97.14% |
| CP019469.1     | 97.14% |
| LK933005.1     | 97.14% |
| LK932396.1     | 97.14% |
| LK932486.1     | 97.14% |
| CP049958.1     | 97.14% |
| CP028361.1     | 97.14% |
| FN665652.1     | 97.14% |

\*removing phiCDKH01 containing strains
